# Supplementary material
Source: PubMed Central journal article supplement (PMC6658773)
Supplement: AAC.00199-19-s0001.pdf [file AAC.00199-19-s0001.pdf]

## Supplemental Material

**Multiple transporters contributed to FTC accumulation in JEG-3 cells.** FTC accumulation in JEG-3 cells was studied to investigate further if transporters were involved in the placental transport of FTC. As shown in Fig. S1, accumulation of FTC (10  $\mu$ M, 3 min) in JEG-3 cells was inhibited remarkably by 1  $\mu$ M NBTI ( $P < 0.01$ ) and 100  $\mu$ M NBTI (an inhibitor of ENTs;  $P < 0.001$ ), 200  $\mu$ M phlorizin (an inhibitor of CNTs;  $P < 0.01$ ) and 200  $\mu$ M adenosine (a substrate/inhibitor of ENTs and CNTs;  $P < 0.01$ ), which indicated that ENTs and CNTs contributed to FTC transport.

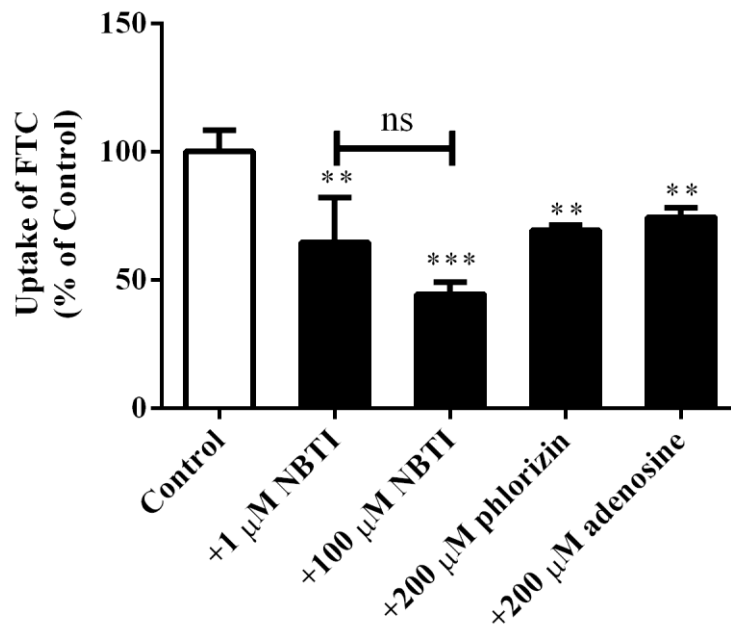

FIG. S1 Effect of specific inhibitors of ENTs (NBTI and dipyridamole) or CNTs (phlorizin) and a general inhibitor of nucleoside transporters (adenosine) on accumulation of FTC (10  $\mu$ M, 3 min) in JEG-3 cells, compared with the control, \*\* $P < 0.01$ , \*\*\* $P < 0.001$ ; comparison between with an inhibitor of NBTI, ns,  $P > 0.05$ .

**Expression of CNTs mRNA in first-trimester and full-term human placentas.** We measured mRNA expression of CNTs in first-trimester and full-term human placentas by RT-PCR. As shown in Fig. S2, CNT1, CNT2 and CNT3 were detected in full-term human placentas. mRNA expression of CNT1 increased significantly ( $P < 0.05$ ). mRNA expression of CNT2/3 increased, but not significantly.

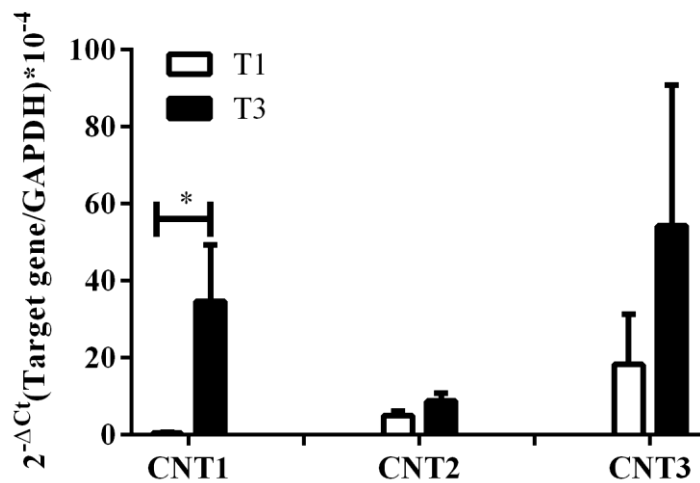

FIG. S2 Expression of CNTs mRNA in the first-trimester (T1, n = 8) and full-term placenta (T3, n = 8), compared with T1, \* $P < 0.05$ .

**FTC is a substrate of MRP1.** FTC was reported to be a substrate of MRP1. For further confirmation, we compared FTC accumulation in mock and MDCK-hMRP1 cells. As shown in Fig. S3, accumulation of FTC (10  $\mu$ M, 60 min) in MDCK-hMRP1 cells was 72% of that observed in mock cells ( $P < 0.05$ ), and 20  $\mu$ M MK571 (an inhibitor of MRPs) increased FTC accumulation in MDCK-hMRP1 cells markedly ( $P < 0.01$ ).

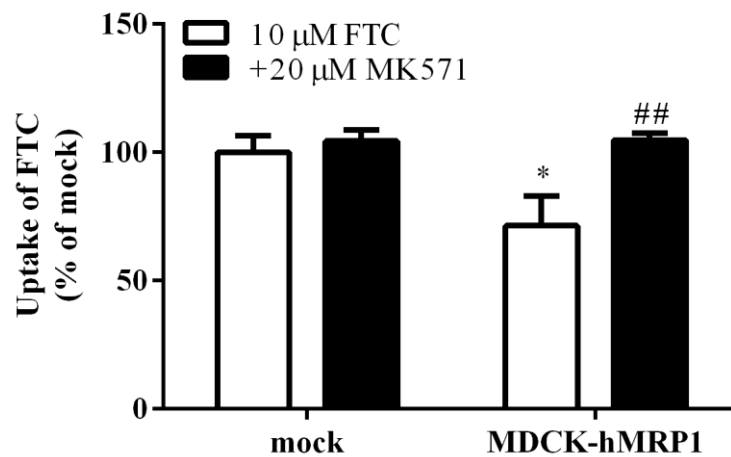

FIG. S3 FTC accumulation in mock and MDCK-hMRP1 cells. Cells were exposed to FTC with or without MK571 (20  $\mu$ M) for 90 min, compared with accumulation in mock cells, \* $P < 0.05$ ; compared with accumulation without an inhibitor, \*\* $P < 0.01$ .

**TABLE S1** siRNA sequences

| Name      | Sense (5' to 3')    |
|-----------|---------------------|
| siENT1-A1 | ACCAAGUUGGACCUCAUUA |
| siENT1-A2 | ACCAAUGAAAGCCACUCUA |
| NC        | UUCUCCGAACGUGUCACGU |

**TABLE S2** Primers used in RT-PCR

| Gene | Direction | Sequence (5' to 3')   | Product Length |
|------|-----------|-----------------------|----------------|
| CNT1 | Forward   | TGAAGTGACAAGGCAAGCCA  | 276 bp         |
|      | Reverse   | TCCAGCTGCTCCTGATCTCT  |                |
| CNT2 | Forward   | ACTGAGGAGCCAGAGGGAAT  | 235 bp         |
|      | Reverse   | CACCGACTCCTCCTCTGGTA  |                |
| CNT3 | Forward   | GCAGGTGGCTTTCTGACAT   | 416 bp         |
|      | Reverse   | AAAATGCCCCAGATGATGTGC |                |
